# Supplementary material for: Placental Transfer and Composition of Perfluoroalkyl Substances (PFASs): A Korean Birth Panel of Parent-Infant Triads
Source: MDPI journal article supplement (doi:10.3390/toxics9070168), 2021-07-14
Supplement: s1 [file s1]

## Article

# Supplementary Material: Placental Transfer and Composition of Perfluoroalkyl Substances (PFASs): A Korean Birth Panel of Parent-Infant Triads

Habyeong Kang, Hee-Sun Kim, Yeong Sook Yoon, Jeongsun Lee, Younglim Kho, Jisun Lee, Hye Jin Chang, Yoon Hee Cho and Young Ah Kim

## Supplementary Materials and Methods

**Table S1.** MS/MS parameters for determination of perfluoroalkyl substances (PFASs) in serum.

| Compound | Precursor Ion (m/z) | Product Ions (m/z) | Collision Energy (V) |
|----------|---------------------|--------------------|----------------------|
| PFPeA    | 263.0               | 218.9              | −12                  |
| PFHxA    | 313.0               | 268.9              | −12                  |
|          |                     | 119.0              | −30                  |
| PFHpA    | 363.0               | 318.9              | −14                  |
|          |                     | 168.9              | −24                  |
| PFOA     | 413.0               | 368.9              | −16                  |
|          |                     | 168.8              | −26                  |
| PFNA     | 463.0               | 418.8              | −14                  |
|          |                     | 218.9              | −26                  |
| PFDA     | 513.0               | 468.9              | −16                  |
|          |                     | 218.9              | −26                  |
| PFUnDA   | 562.9               | 518.9              | −18                  |
|          |                     | 268.8              | −26                  |
| PFDoDA   | 613.0               | 569.0              | −18                  |
|          |                     | 168.8              | −40                  |
| PFTrDA   | 663.0               | 619.1              | −16                  |
|          |                     | 168.9              | −44                  |
| PFTeDA   | 713.1               | 669.1              | −20                  |
|          |                     | 168.9              | −44                  |
| PFBS     | 298.9               | 79.8               | −60                  |
|          |                     | 99.0               | −42                  |
| PFHxS    | 399.0               | 79.9               | −78                  |
|          |                     | 98.9               | −54                  |
| PFOS     | 499.0               | 80.1               | −92                  |
|          |                     | 99.0               | −70                  |

Abbreviations: tandem mass spectrometry, MS/MS.

**Table S2.** LC-MS/MS conditions for determination of perfluoroalkyl substances (PFASs) in serum.

| Parameter |                     | Condition                                                              |    |     |     |      |    |
|-----------|---------------------|------------------------------------------------------------------------|----|-----|-----|------|----|
| HPLC      | Column              | YMC-Pack ODS-AQ, 2.0 × 150 mm, 3.0 µm                                  |    |     |     |      |    |
|           | Mobile phase        | A: 5 mM ammonium acetate and 0.02% formic acid in water<br>B: methanol |    |     |     |      |    |
|           | Gradient            | Time (min)                                                             | 0  | 5   | 13  | 13.1 | 25 |
|           |                     | A (%)                                                                  | 70 | 0   | 0   | 70   | 70 |
|           |                     | B (%)                                                                  | 30 | 100 | 100 | 30   | 30 |
|           | Flow rate           | 200 µL/min                                                             |    |     |     |      |    |
|           | Injection volume    | 3 µL                                                                   |    |     |     |      |    |
| MS/MS     | Mode                | ESI negative                                                           |    |     |     |      |    |
|           | Curtain Gas         | 25 psi                                                                 |    |     |     |      |    |
|           | Gas temperature     | 400 °C                                                                 |    |     |     |      |    |
|           | Ion spray voltage   | −4000 kV                                                               |    |     |     |      |    |
|           | Ion source gas 1    | 40 psi                                                                 |    |     |     |      |    |
|           | Ion source gas 2    | 60 psi                                                                 |    |     |     |      |    |
|           | Collision gas (CAD) | 6                                                                      |    |     |     |      |    |

Abbreviations: high-performance liquid chromatography, HPLC; tandem mass spectrometry, MS/MS.

**Table S3.** Limits of detection (LODs) of perfluoroalkyl substances (PFASs).

| Compound | LOD (ng/mL) |
|----------|-------------|
| PFPeA    | 0.07        |
| PFHxA    | 0.06        |
| PFHpA    | 0.05        |
| PFOA     | 0.05        |
| PFNA     | 0.03        |
| PFDA     | 0.06        |
| PFUnDA   | 0.05        |
| PFDoDA   | 0.07        |
| PFTTrDA  | 0.05        |
| PFTeDA   | 0.03        |
| PFBS     | 0.08        |
| PFHxS    | 0.05        |
| PFOS     | 0.03        |

## Supplementary Results

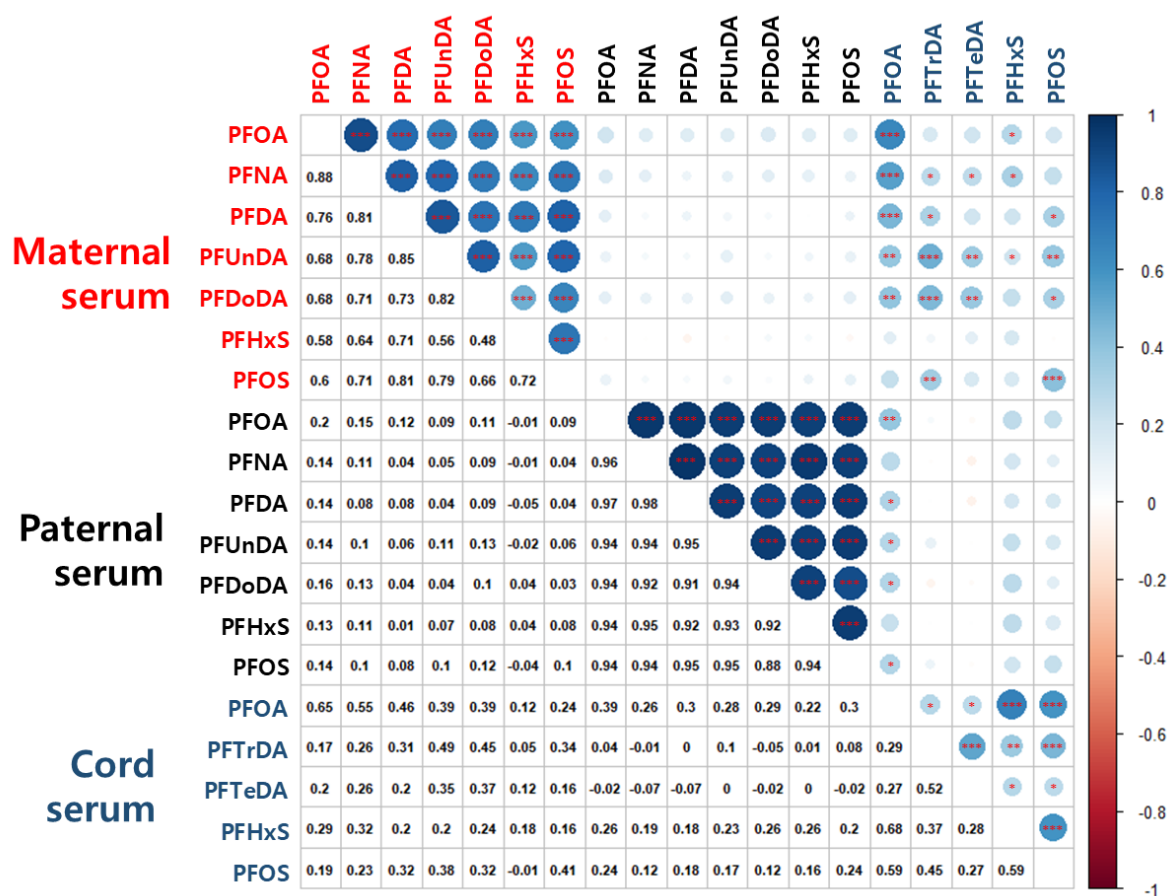

**Figure S1.** Spearman's correlation among perfluoroalkyl substances (PFASs) in maternal, paternal, and cord serum. The size and the color of the circles represent the correlation coefficients. Asterisks (\*, \*\*, and \*\*\*) on the circles represent  $p < 0.05$ ,  $p < 0.01$ , and  $p < 0.001$ , respectively.
